# Supplementary material for: Application of CT Radiomics Combined with Machine Learning Methods in Predicting the Recurrence or Metastasis of Gastrointestinal Stromal Tumors
Source: Research Square preprint supplement (doi:10.21203/rs.3.rs-1124517/v2), 2021-12-27
Supplement: Supplementary file 1 [file ef68e909c5510b1313265f1e.docx]

Table S1

The selected features of each model in arterial and venous phase

| **Selection** | **Classification** | Features | |
| --- | --- | --- | --- |
| Arterial phase | venous phase |
| **ANOVA** | **AdaBoost** | wavelet-HHH_glrlm_LongRunLowGrayLevelEmphasis | wavelet-HHL_glrlm_RunVariance |
| **AE** | wavelet-HHH_gldm_DependenceVariance | wavelet-HHL_glrlm_RunVariance |
| wavelet-HHH_glrlm_LongRunLowGrayLevelEmphasis |
| wavelet-HHH_glrlm_RunVariance | wavelet-LHL_glrlm_RunVariance |
| wavelet-LLH_glcm_MaximumProbability |
| **DT** | wavelet-HHH_glrlm_LongRunLowGrayLevelEmphasis | wavelet-HHL_glrlm_RunVariance |
| wavelet-HLL_glrlm_RunVariance |
| wavelet-LHL_glrlm_RunVariance |
| **GP** | wavelet-HHH_glrlm_LongRunLowGrayLevelEmphasis | original_glszm_ZoneEntropy |
| original_shape_Maximum2DDiameterColumn |
| original_shape_Maximum2DDiameterRow |
| original_shape_Maximum3DDiameter |
| original_shape_Sphericity |
| wavelet-HHL_glrlm_RunVariance |
| wavelet-HLL_glrlm_RunVariance |
| wavelet-LHL_glrlm_RunVariance |
| wavelet-LLL_glszm_ZoneEntropy |
| **LASSO** | wavelet-HHH_glrlm_LongRunLowGrayLevelEmphasis | original_glszm_ZoneEntropy |
| wavelet-LLH_glcm_MaximumProbability | original_shape_Maximum2DDiameterColumn |
| original_shape_Maximum2DDiameterRow |
| original_shape_Maximum3DDiameter |
| original_shape_Sphericity |
| wavelet-HHL_glrlm_RunVariance |
| wavelet-HLL_glrlm_RunVariance |
| wavelet-LHL_glrlm_RunVariance |
| **LDA** | wavelet-HHH_glrlm_LongRunLowGrayLevelEmphasis | original_glszm_ZoneEntropy |
| wavelet-LLH_glcm_MaximumProbability | original_shape_Maximum2DDiameterColumn |
| original_shape_Maximum2DDiameterRow |
| original_shape_Maximum3DDiameter |
| original_shape_Sphericity |
| wavelet-HHL_glrlm_RunVariance |
| wavelet-HLL_glrlm_RunVariance |
| wavelet-LHL_glrlm_RunVariance |
| **LR** | wavelet-HHH_glrlm_LongRunLowGrayLevelEmphasis | wavelet-HHL_glrlm_RunVariance |
| wavelet-LLH_glcm_MaximumProbability | wavelet-HLL_glrlm_RunVariance |
| wavelet-LHL_glrlm_RunVariance |
| **NB** | wavelet-HHH_gldm_DependenceVariance | wavelet-LHL_glrlm_RunVariance |
| wavelet-HHH_glrlm_LongRunLowGrayLevelEmphasis |
| wavelet-HHH_glrlm_RunVariance | wavelet-LHL_glrlm_RunVariance |
| wavelet-LLH_glcm_MaximumProbability |
| wavelet-LLL_glcm_Imc1 |
| **RF** | wavelet-HHH_glrlm_LongRunLowGrayLevelEmphasis | original_glcm_Idn |
| original_glszm_ZoneEntropy |
| original_shape_LeastAxisLength |
| original_shape_Maximum2DDiameterColumn |
| original_shape_Maximum2DDiameterRow |
| original_shape_Maximum3DDiameter |
| original_shape_Sphericity |
| wavelet-HHH_glrlm_LongRunLowGrayLevelEmphasis |
| wavelet-HHH_glrlm_ShortRunEmphasis |
| wavelet-HHL_glrlm_RunVariance |
| wavelet-HHL_glrlm_ShortRunEmphasis |
| wavelet-HLL_glrlm_RunVariance |
| wavelet-LHL_glrlm_RunVariance |
| wavelet-LLH_firstorder_Kurtosis |
| wavelet-LLL_glszm_ZoneEntropy |
| **SVM** | wavelet-HHH_glrlm_LongRunLowGrayLevelEmphasis | original_glcm_Idn |
| wavelet-LLH_glcm_MaximumProbability | original_glszm_ZoneEntropy |
| original_shape_LeastAxisLength |
| original_shape_Maximum2DDiameterColumn |
| original_shape_Maximum2DDiameterRow |
| original_shape_Maximum2DDiameterSlice |
| original_shape_Maximum3DDiameter |
| original_shape_MinorAxisLength |
| original_shape_Sphericity |
| wavelet-HHH_glrlm_LongRunLowGrayLevelEmphasis |
| wavelet-HHH_glrlm_RunPercentage |
| wavelet-HHH_glrlm_ShortRunEmphasis |
| wavelet-HHL_glrlm_RunVariance |
| wavelet-HHL_glrlm_ShortRunEmphasis |
| wavelet-HLL_glrlm_RunVariance |
| wavelet-LHL_glrlm_RunVariance |
| wavelet-LLH_firstorder_Kurtosis |
| wavelet-LLL_glszm_ZoneEntropy |
| **KW** | **AdaBoost** | wavelet-HHH_firstorder_TotalEnergy | original_shape_Maximum2DDiameterColumn |
| wavelet-LHH_firstorder_TotalEnergy | original_shape_Maximum3DDiameter |
| wavelet-LLH_glszm_LargeAreaEmphasis | wavelet-LHH_glszm_GrayLevelNonUniformity |
| wavelet-LLH_glszm_LargeAreaLowGrayLevelEmphasis | wavelet-LLH_firstorder_Kurtosis |
| **AE** | wavelet-HHH_firstorder_TotalEnergy | original_shape_Maximum2DDiameterColumn |
| wavelet-HHH_glrlm_LongRunLowGrayLevelEmphasis | original_shape_Maximum2DDiameterRow |
| wavelet-HHL_glszm_LargeAreaEmphasis | original_shape_Maximum3DDiameter |
| wavelet-HHL_glszm_LargeAreaLowGrayLevelEmphasis | original_shape_Sphericity |
| wavelet-HHL_ngtdm_Busyness | original_shape_SurfaceArea |
| wavelet-LHH_firstorder_TotalEnergy | wavelet-HHH_glszm_LargeAreaLowGrayLevelEmphasis |
| wavelet-LLH_glszm_LargeAreaEmphasis | wavelet-HHL_glszm_LargeAreaEmphasis |
| wavelet-LLH_glszm_LargeAreaLowGrayLevelEmphasis | wavelet-HHL_glszm_LargeAreaHighGrayLevelEmphasis |
| wavelet-HHL_glszm_LargeAreaLowGrayLevelEmphasis |
| wavelet-HLL_glszm_LargeAreaHighGrayLevelEmphasis |
| wavelet-LHH_glszm_GrayLevelNonUniformity |
| wavelet-LHH_glszm_SizeZoneNonUniformity |
| wavelet-LHL_glszm_LargeAreaHighGrayLevelEmphasis |
| wavelet-LLH_firstorder_Kurtosis |
| wavelet-LLL_glrlm_RunLengthNonUniformity |
| wavelet-LLL_glszm_GrayLevelNonUniformity |
| **DT** | wavelet-HHH_firstorder_TotalEnergy | original_shape_Maximum2DDiameterColumn |
| wavelet-LHH_firstorder_TotalEnergy | original_shape_Maximum3DDiameter |
| wavelet-LLH_glszm_LargeAreaLowGrayLevelEmphasis | wavelet-LHH_glszm_GrayLevelNonUniformity |
| wavelet-LLH_firstorder_Kurtosis |
| **GP** | wavelet-HHH_firstorder_TotalEnergy | original_shape_Maximum2DDiameterColumn |
| wavelet-LHH_firstorder_TotalEnergy | original_shape_Maximum2DDiameterRow |
| wavelet-LLH_glszm_LargeAreaLowGrayLevelEmphasis | original_shape_Maximum3DDiameter |
| pwavelet-HHL_glszm_LargeAreaEmphasis |
| wavelet-LHH_glszm_GrayLevelNonUniformity |
| wavelet-LLH_firstorder_Kurtosis |
| **LASSO** | wavelet-HHH_firstorder_TotalEnergy | original_shape_Maximum2DDiameterColumn |
| original_shape_Maximum2DDiameterRow |
| original_shape_Maximum3DDiameter |
| pwavelet-HHL_glszm_LargeAreaEmphasis |
| wavelet-LHH_glszm_GrayLevelNonUniformity |
| wavelet-LLH_firstorder_Kurtosis |
| **LDA** | wavelet-HHH_firstorder_TotalEnergy | wavelet-LLH_firstorder_Kurtosis |
| wavelet-HHH_glrlm_LongRunLowGrayLevelEmphasis |
| wavelet-HHL_glszm_LargeAreaEmphasis |
| wavelet-HHL_glszm_LargeAreaLowGrayLevelEmphasis |
| wavelet-HHL_ngtdm_Busyness |
| wavelet-LHH_firstorder_TotalEnergy |
| wavelet-LLH_glszm_LargeAreaEmphasis |
| wavelet-LLH_glszm_LargeAreaHighGrayLevelEmphasis |
| wavelet-LLH_glszm_LargeAreaLowGrayLevelEmphasis |
| **LR** | wavelet-HHH_firstorder_TotalEnergy | original_shape_Maximum2DDiameterColumn |
| original_shape_Maximum2DDiameterRow |
| original_shape_Maximum3DDiameter |
| wavelet-HHL_glszm_LargeAreaEmphasis |
| wavelet-HHL_glszm_LargeAreaHighGrayLevelEmphasis |
| wavelet-LHH_glszm_GrayLevelNonUniformity |
| wavelet-LHL_glszm_LargeAreaHighGrayLevelEmphasis |
| wavelet-LLH_firstorder_Kurtosis |
| **NB** | wavelet-HHH_firstorder_TotalEnergy | wavelet-LLH_firstorder_Kurtosis |
| **RF** | wavelet-HHH_firstorder_TotalEnergy | original_shape_Maximum2DDiameterColumn |
| original_shape_Maximum2DDiameterRow |
| original_shape_Maximum3DDiameter |
| original_shape_SurfaceArea |
| wavelet-HHL_glszm_LargeAreaEmphasis |
| wavelet-HHL_glszm_LargeAreaHighGrayLevelEmphasis |
| wavelet-LHH_glszm_GrayLevelNonUniformity |
| wavelet-LHL_glszm_LargeAreaHighGrayLevelEmphasis |
| wavelet-LLH_firstorder_Kurtosis |
| wavelet-LLL_glrlm_RunLengthNonUniformity |
| wavelet-LLL_glszm_GrayLevelNonUniformity |
| **SVM** | wavelet-HHH_firstorder_TotalEnergy | original_shape_Maximum2DDiameterColumn |
| original_shape_Maximum2DDiameterRow |
| original_shape_Maximum3DDiameter |
| pwavelet-HHL_glszm_LargeAreaEmphasis |
| wavelet-LHH_glszm_GrayLevelNonUniformity |
| wavelet-LLH_firstorder_Kurtosis |
| **Relief** | **AdaBoost** | wavelet-LHH_glcm_DifferenceEntropy | wavelet-HLH_firstorder_Median |
| wavelet-HLH_glrlm_GrayLevelNonUniformityNormalized | wavelet-HLH_firstorder_Mean |
| wavelet-LHH_glcm_JointEntropy | original_shape_Sphericity |
| wavelet-LHH_glcm_SumEntropy |
| wavelet-HLH_glrlm_GrayLevelVariance |
| wavelet-HLH_glcm_DifferenceVariance |
| wavelet-LHH_glrlm_GrayLevelNonUniformityNormalized |
| wavelet-LHH_glcm_SumSquares |
| wavelet-HHH_ngtdm_Contrast |
| original_glcm_MCC |
| wavelet-LHH_glszm_GrayLevelVariance |
| wavelet-HHL_firstorder_Median |
| original_glcm_Imc1 |
| wavelet-HLL_ngtdm_Strength |
| wavelet-HLL_glszm_SmallAreaEmphasis |
| wavelet-HHH_firstorder_Entropy |
| wavelet-HLH_glcm_JointEntropy |
| wavelet-HLL_gldm_SmallDependenceHighGrayLevelEmphasis |
| wavelet-HHH_glcm_Autocorrelation |
| wavelet-LHH_glszm_SizeZoneNonUniformityNormalized |
| **AE** | wavelet-LHH_glcm_DifferenceEntropy | wavelet-HLH_firstorder_Median |
| wavelet-HLH_firstorder_Mean |
| original_shape_Sphericity |
| wavelet-HLL_glszm_LargeAreaHighGrayLevelEmphasis |
| **DT** | wavelet-LHH_glcm_DifferenceEntropy | wavelet-HLH_firstorder_Median |
| wavelet-HLH_glrlm_GrayLevelNonUniformityNormalized | wavelet-HLH_firstorder_Mean |
| wavelet-LHH_glcm_JointEntropy | original_shape_Sphericity |
| wavelet-LHH_glcm_SumEntropy | wavelet-HLL_glszm_LargeAreaHighGrayLevelEmphasis |
| wavelet-HLH_glrlm_GrayLevelVariance |
| wavelet-HLH_glcm_DifferenceVariance |
| wavelet-LHH_glrlm_GrayLevelNonUniformityNormalized |
| wavelet-LHH_glcm_SumSquares |
| wavelet-HHH_ngtdm_Contrast |
| original_glcm_MCC |
| wavelet-LHH_glszm_GrayLevelVariance |
| wavelet-HHL_firstorder_Median |
| original_glcm_Imc1 |
| wavelet-HLL_ngtdm_Strength |
| wavelet-HLL_glszm_SmallAreaEmphasis |
| wavelet-HHH_firstorder_Entropy |
| wavelet-HLH_glcm_JointEntropy |
| wavelet-HLL_gldm_SmallDependenceHighGrayLevelEmphasis |
| **GP** | wavelet-LHH_glcm_DifferenceEntropy | wavelet-HLH_firstorder_Median |
| wavelet-LHH_glcm_DifferenceEntropy | wavelet-HLH_firstorder_Mean |
| wavelet-LHH_glcm_DifferenceEntropy | original_shape_Sphericity |
| wavelet-LHH_glcm_DifferenceEntropy |
| wavelet-LHH_glcm_DifferenceEntropy |
| wavelet-LHH_glcm_DifferenceEntropy |
| wavelet-LHH_glcm_DifferenceEntropy |
| wavelet-LHH_glcm_DifferenceEntropy |
| **LASSO** | wavelet-LHH_glcm_DifferenceEntropy | wavelet-HLH_firstorder_Median |
| wavelet-HLH_glrlm_GrayLevelNonUniformityNormalized | wavelet-HLH_firstorder_Mean |
| original_shape_Sphericity |
| wavelet-HLL_glszm_LargeAreaHighGrayLevelEmphasis |
| **LDA** | wavelet-LHH_glcm_DifferenceEntropy | wavelet-HLH_firstorder_Median |
| wavelet-HLH_glrlm_GrayLevelNonUniformityNormalized | wavelet-HLH_firstorder_Mean |
| wavelet-LHH_glcm_JointEntropy | original_shape_Sphericity |
| wavelet-LHH_glcm_SumEntropy |
| wavelet-HLH_glrlm_GrayLevelVariance |
| wavelet-HLH_glcm_DifferenceVariance |
| wavelet-LHH_glrlm_GrayLevelNonUniformityNormalized |
| wavelet-LHH_glcm_SumSquares |
| wavelet-HHH_ngtdm_Contrast |
| original_glcm_MCC |
| wavelet-LHH_glszm_GrayLevelVariance |
| wavelet-HHL_firstorder_Median |
| original_glcm_Imc1 |
| wavelet-HLL_ngtdm_Strength |
| wavelet-HLL_glszm_SmallAreaEmphasis |
| wavelet-HHH_firstorder_Entropy |
| wavelet-HLH_glcm_JointEntropy |
| wavelet-HLL_gldm_SmallDependenceHighGrayLevelEmphasis |
| **LR** | wavelet-LHH_glcm_DifferenceEntropy | wavelet-HLH_firstorder_Median |
| wavelet-HLH_glrlm_GrayLevelNonUniformityNormalized | wavelet-HLH_firstorder_Mean |
| wavelet-LHH_glcm_JointEntropy | original_shape_Sphericity |
| wavelet-LHH_glcm_SumEntropy | wavelet-HLL_glszm_LargeAreaHighGrayLevelEmphasis |
| wavelet-HLH_glrlm_GrayLevelVariance |
| wavelet-HLH_glcm_DifferenceVariance |
| wavelet-LHH_glrlm_GrayLevelNonUniformityNormalized |
| wavelet-LHH_glcm_SumSquares |
| wavelet-HHH_ngtdm_Contrast |
| original_glcm_MCC |
| wavelet-LHH_glszm_GrayLevelVariance |
| wavelet-HHL_firstorder_Median |
| original_glcm_Imc1 |
| wavelet-HLL_ngtdm_Strength |
| wavelet-HLL_glszm_SmallAreaEmphasis |
| wavelet-HHH_firstorder_Entropy |
| wavelet-HLH_glcm_JointEntropy |
| wavelet-HLL_gldm_SmallDependenceHighGrayLevelEmphasis |
| **NB** | wavelet-LHH_glcm_DifferenceEntropy | wavelet-HLH_firstorder_Median |
| wavelet-HLH_glrlm_GrayLevelNonUniformityNormalized | wavelet-HLH_firstorder_Mean |
| wavelet-LHH_glcm_JointEntropy | original_shape_Sphericity |
| wavelet-LHH_glcm_SumEntropy | wavelet-HLL_glszm_LargeAreaHighGrayLevelEmphasis |
| wavelet-HLH_glrlm_GrayLevelVariance | wavelet-LHL_glszm_LargeAreaHighGrayLevelEmphasis |
| original_glcm_JointEnergy |
| original_firstorder_Uniformity |
| original_glcm_MaximumProbability |
| wavelet-LHL_glszm_LowGrayLevelZoneEmphasis |
| wavelet-HLH_gldm_GrayLevelVariance |
| original_gldm_LargeDependenceEmphasis |
| wavelet-LHH_gldm_SmallDependenceEmphasis |
| wavelet-LHL_gldm_SmallDependenceLowGrayLevelEmphasis |
| **RF** | wavelet-LHH_glcm_DifferenceEntropy | wavelet-HLH_firstorder_Median |
| wavelet-LHH_glcm_DifferenceEntropy | wavelet-HLH_firstorder_Mean |
| wavelet-LHH_glcm_DifferenceEntropy | original_shape_Sphericity |
| wavelet-LHH_glcm_DifferenceEntropy | wavelet-HLL_glszm_LargeAreaHighGrayLevelEmphasis |
| wavelet-LHH_glcm_DifferenceEntropy | wavelet-LHL_glszm_LargeAreaHighGrayLevelEmphasis |
| wavelet-LHH_glcm_DifferenceEntropy | original_glcm_JointEnergy |
| wavelet-LHH_glcm_DifferenceEntropy |
| wavelet-LHH_glcm_DifferenceEntropy |
| **SVM** | wavelet-LHH_glcm_DifferenceEntropy | wavelet-HLH_firstorder_Median |
| wavelet-HLH_glrlm_GrayLevelNonUniformityNormalized | wavelet-HLH_firstorder_Mean |
| wavelet-LHH_glcm_JointEntropy | original_shape_Sphericity |
| wavelet-LHH_glcm_SumEntropy |
| wavelet-HLH_glrlm_GrayLevelVariance |
| wavelet-HLH_glcm_DifferenceVariance |
| wavelet-LHH_glrlm_GrayLevelNonUniformityNormalized |
| wavelet-LHH_glcm_SumSquares |
| wavelet-HHH_ngtdm_Contrast |
| original_glcm_MCC |
| wavelet-LHH_glszm_GrayLevelVariance |
| wavelet-HHL_firstorder_Median |
| original_glcm_Imc1 |
| wavelet-HLL_ngtdm_Strength |
| wavelet-HLL_glszm_SmallAreaEmphasis |
| wavelet-HHH_firstorder_Entropy |
| wavelet-HLH_glcm_JointEntropy |
| wavelet-HLL_gldm_SmallDependenceHighGrayLevelEmphasis |
| wavelet-HHH_glcm_Autocorrelation |
| wavelet-LHH_glszm_SizeZoneNonUniformityNormalized |
| **RFE** | **AdaBoost** | original_ngtdm_Busyness | original_shape_Sphericity |
| wavelet-HHH_glrlm_LongRunLowGrayLevelEmphasis |
| wavelet-LHL_firstorder_Kurtosis |
| wavelet-LLH_glcm_MaximumProbability |
| **AE** | original_firstorder_Skewness | original_shape_Sphericity |
| original_glcm_Imc1 | wavelet-LLH_firstorder_Kurtosis |
| original_glcm_MCC | wavelet-LLL_glcm_MCC |
| original_glrlm_ShortRunEmphasis |
| original_glszm_GrayLevelNonUniformityNormalized |
| original_glszm_LargeAreaLowGrayLevelEmphasis |
| original_ngtdm_Busyness |
| original_shape_Elongation |
| wavelet-HHH_glrlm_LongRunLowGrayLevelEmphasis |
| wavelet-HHL_gldm_DependenceVariance |
| wavelet-HLH_glrlm_RunEntropy |
| wavelet-HLL_glszm_SmallAreaEmphasis |
| wavelet-LHH_glszm_GrayLevelNonUniformityNormalized |
| wavelet-LHH_glszm_SizeZoneNonUniformityNormalized |
| wavelet-LHL_firstorder_Kurtosis |
| wavelet-LHL_glszm_LowGrayLevelZoneEmphasis |
| wavelet-LLH_glcm_MaximumProbability |
| wavelet-LLL_firstorder_Kurtosis |
| wavelet-LLL_firstorder_Skewness |
| wavelet-LLL_glcm_Imc1 |
| **DT** | original_firstorder_Skewness | original_shape_Sphericity |
| original_glcm_Imc1 | wavelet-LLL_glcm_MCC |
| original_glcm_MCC |
| original_glszm_GrayLevelNonUniformityNormalized |
| original_glszm_LargeAreaLowGrayLevelEmphasis |
| original_ngtdm_Busyness |
| wavelet-HHH_glrlm_LongRunLowGrayLevelEmphasis |
| wavelet-HHL_gldm_DependenceVariance |
| wavelet-HLH_glrlm_RunEntropy |
| wavelet-LHH_glszm_GrayLevelNonUniformityNormalized |
| wavelet-LHH_glszm_SizeZoneNonUniformityNormalized |
| wavelet-LHL_firstorder_Kurtosis |
| wavelet-LLH_glcm_MaximumProbability |
| wavelet-LLL_firstorder_Skewness |
| wavelet-LLL_glcm_Imc1 |
| **GP** | wavelet-HHH_glrlm_LongRunLowGrayLevelEmphasis | original_shape_Sphericity |
| wavelet-LLH_glcm_MaximumProbability |
| **LASSO** | wavelet-HHH_glrlm_LongRunLowGrayLevelEmphasis | original_shape_Sphericity |
| wavelet-LLH_glcm_MaximumProbability |
| **LDA** | original_glszm_GrayLevelNonUniformityNormalized | original_shape_Sphericity |
| aoriginal_ngtdm_Busyness |
| wavelet-HHH_glrlm_LongRunLowGrayLevelEmphasis |
| wavelet-LHL_firstorder_Kurtosis |
| wavelet-LLH_glcm_MaximumProbability |
| **LR** | original_ngtdm_Busyness | original_shape_Sphericity |
| original_ngtdm_Busyness |
| original_ngtdm_Busyness |
| **NB** | original_firstorder_Skewness | original_shape_Sphericity |
| original_glcm_Imc1 |
| original_glszm_GrayLevelNonUniformityNormalized |
| original_ngtdm_Busyness |
| wavelet-HHH_glrlm_LongRunLowGrayLevelEmphasis |
| wavelet-HHL_gldm_DependenceVariance |
| wavelet-LHH_glszm_GrayLevelNonUniformityNormalized |
| wavelet-LHL_firstorder_Kurtosis |
| wavelet-LLH_glcm_MaximumProbability |
| **RF** | original_firstorder_Skewness | original_shape_Sphericity |
| original_glszm_GrayLevelNonUniformityNormalized | wavelet-LLH_firstorder_Kurtosis |
| original_ngtdm_Busyness | wavelet-LLL_glcm_MCC |
| wavelet-HHH_glrlm_LongRunLowGrayLevelEmphasis |
| wavelet-HHL_gldm_DependenceVariance |
| wavelet-LHH_glszm_GrayLevelNonUniformityNormalized |
| wavelet-LHL_firstorder_Kurtosis |
| wavelet-LLH_glcm_MaximumProbability |
| **SVM** | original_ngtdm_Busyness | original_shape_Sphericity |
| wavelet-HHH_glrlm_LongRunLowGrayLevelEmphasis |
| wavelet-LHL_firstorder_Kurtosis |
| wavelet-LLH_glcm_MaximumProbability |
